# Supplementary material
Source: PubMed Central journal article supplement (PMC4983447)
Supplement: NIHMS791438-supplement-Supplement.pdf [file NIHMS791438-supplement-Supplement.pdf]

**Table S1. Unadjusted baseline total hip and femoral neck BMD values by sex stratified by machine type.**

| Lunar             | Men (n=97)      | Women (n=101)   | P Value |
|-------------------|-----------------|-----------------|---------|
| Total Hip BMD     | 0.8126 ± 0.1419 | 0.72 ± 0.1349   | <0.0001 |
| Femoral Neck BMD  | 0.7679 ± 0.129  | 0.7094 ± 0.1281 | 0.0016  |
| Hologic Machine   | Men (n=26)      | Women (n=29)    | P Value |
| Total Hip BMD     | 0.7818 ± 0.1453 | 0.6955 ± 0.119  | 0.019   |
| Femoral Neck BMD  | 0.6319 ± 0.1117 | 0.5781 ± 0.0964 | 0.0607  |
| Lunar             | Men (n=97)      | Women (n=101)   | P Value |
| Total Hip sBMD    | 0.7738 ± 0.1345 | 0.6825 ± 0.1279 | <0.0001 |
| Femoral Neck sBMD | 0.7034 ± 0.1181 | 0.6498 ± 0.1174 | 0.0016  |
| Hologic Machine   | Men (n=26)      | Women (n=29)    | P Value |
| Total Hip sBMD    | 0.7928 ± 0.1473 | 0.7053 ± 0.1207 | 0.019   |
| Femoral Neck sBMD | 0.6989 ± 0.1235 | 0.6394 ± 0.1066 | 0.0607  |

**Table S2. Baseline medication profiles among men and women hip fracture participants that reported ever taking bone-active drugs.**

| Medication (n, %) | Men (n=12) |                | Women (n=60) |                |
|-------------------|------------|----------------|--------------|----------------|
|                   | Past (n=1) | Current (n=11) | Past (n=21)  | Current (n=39) |
| Etidronate        | 0 (0%)     | 0 (0%)         | 0 (0%)       | 0 (0%)         |
| Alendronate       | 1 (100%)   | 8 (72.7%)      | 20 (95.2%)   | 31 (79.5%)     |
| Risedronate       | 0 (0%)     | 1 (9.1%)       | 5 (23.8%)    | 14 (35.9%)     |
| Ibandronate       | 0 (0%)     | 0 (0%)         | 2 (9.5%)     | 4 (10.3%)      |
| Teriparatide      | 0 (0%)     | 1 (9.1%)       | 1 (4.8%)     | 2 (5.1%)       |
| Calcitonin        | 0 (0%)     | 0 (0%)         | 2 (9.5%)     | 6 (15.4%)      |
| Zoledronic Acid   | 0 (0%)     | 1 (9.1%)       | 0 (0%)       | 0 (0%)         |

**Table S3. Unadjusted and adjusted absolute change (grams per centimeter squared) and percent change in total hip sBMD between men and women following hip fracture patients at 2, 6, and 12 months.**

| Time Point | Men        |                   |      | Women      |                   |      |       |
|------------|------------|-------------------|------|------------|-------------------|------|-------|
| Unadjusted | BMD Change | 95% CI            | *P   | BMD Change | 95% CI            | *P   | **P   |
| Baseline   | 0.7794     | (0.7538, 0.8050)  | REF  | 0.6870     | (0.6646, 0.7094)  | REF  | *0.88 |
| Δ T2       | -0.0044    | (-0.0237, 0.0149) | 0.65 | -0.0021    | (-0.0215, 0.0172) | 0.83 | 0.86  |
| Δ T6       | -0.0020    | (-0.0298, 0.0257) | 0.88 | -0.0049    | (-0.0279, 0.0181) | 0.68 | 0.87  |
| Δ T12      | -0.0178    | (-0.0441, 0.0085) | 0.18 | -0.0048    | (-0.0305, 0.0209) | 0.71 | 0.48  |
| Unadjusted | % Change   | 95% CI            | *P   | % Change   | 95% CI            | *P   | **P   |
| Baseline   | REF        | REF               | REF  | REF        | REF               | REF  | *0.88 |
| Δ T2       | -0.57      | (-3.04, 1.91)     | 0.65 | -0.31      | (-3.13, 2.51)     | 0.83 | 0.86  |
| Δ T6       | -0.26      | (-3.83, 3.30)     | 0.88 | -0.71      | (-4.06, 2.63)     | 0.68 | 0.87  |
| Δ T12      | -2.28      | (-5.66, 1.10)     | 0.18 | -0.70      | (-4.44, 3.04)     | 0.71 | 0.48  |
| Adjusted   | BMD Change | 95% CI            | *P   | BMD Change | 95% CI            | *P   | **P   |
| Baseline   | 0.7541     | (0.7270, 0.7812)  | REF  | 0.7172     | (0.6894, 0.7450)  | REF  | *0.91 |
| Δ T2       | -0.0076    | (-0.0241, 0.0089) | 0.36 | -0.0031    | (-0.0185, 0.0124) | 0.69 | 0.68  |
| Δ T6       | -0.0151    | (-0.0356, 0.0055) | 0.15 | -0.0104    | (-0.0273, 0.0064) | 0.22 | 0.72  |
| Δ T12      | -0.0181    | (-0.0422, 0.0061) | 0.14 | -0.0068    | (-0.0275, 0.0139) | 0.51 | 0.49  |
| Adjusted   | % Change   | 95% CI            | *P   | % Change   | 95% CI            | *P   | **P   |
| Baseline   | REF        | REF               | REF  | REF        | REF               | REF  | *0.91 |
| Δ T2       | -1.01      | (-3.20, 1.18)     | 0.36 | -0.43      | (-2.58, 1.72)     | 0.69 | 0.68  |
| Δ T6       | -2.00      | (-4.73, 0.73)     | 0.15 | -1.46      | (-3.81, 0.90)     | 0.22 | 0.72  |
| Δ T12      | -2.40      | (-5.60, 0.80)     | 0.14 | -0.95      | (-3.84, 1.94)     | 0.51 | 0.49  |

\*P values for the sex- and time-specific changes.

\*\*P values for the \*global test of the sex by time interaction and time specific sex differences.

Adjusted for potential confounders: race, age, weight, height, smoking, alcohol use, bisphosphonates, glucocorticoids, hormone therapy, calcium supplements, comorbidity count, instrumental activities of daily living, center for epidemiologic studies depression scale, and DXA measurement site.

**Table S4. Unadjusted and adjusted absolute change (grams per centimeter squared) and percent change in femoral neck sBMD between men and women following hip fracture patients at 2, 6, and 12 months.**

| Time Point | Men        |                    |       | Women      |                   |      |       |
|------------|------------|--------------------|-------|------------|-------------------|------|-------|
| Unadjusted | BMD Change | 95% CI             | *P    | BMD Change | 95% CI            | *P   | **P   |
| Baseline   | 0.7040     | (0.6812, 0.7267)   | REF   | 0.6485     | (0.6281, 0.6690)  | REF  | *0.43 |
| Δ T2       | 0.0005     | (-0.0163, 0.0174)  | 0.94  | -0.0047    | (-0.0216, 0.0122) | 0.58 | 0.66  |
| Δ T6       | -0.0028    | (-0.0266, 0.0210)  | 0.81  | -0.0015    | (-0.0233, 0.0202) | 0.89 | 0.93  |
| Δ T12      | -0.0280    | (-0.0525, -0.0033) | 0.02  | -0.0044    | (-0.0291, 0.0203) | 0.72 | 0.18  |
| Unadjusted | % Change   | 95% CI             | *P    | % Change   | 95% CI            | *P   | **P   |
| Baseline   | REF        | REF                | REF   | REF        | REF               | REF  | *0.43 |
| Δ T2       | 0.08       | (-2.32, 2.47)      | 0.94  | -0.73      | (-3.34, 1.89)     | 0.58 | 0.66  |
| Δ T6       | -0.40      | (-3.79, 2.98)      | 0.81  | -0.24      | (-3.60, 3.12)     | 0.89 | 0.93  |
| Δ T12      | -3.97      | (-7.46, -0.47)     | 0.02  | -0.67      | (-4.48, 3.13)     | 0.72 | 0.18  |
| Adjusted   | BMD Change | 95% CI             | *P    | BMD Change | 95% CI            | *P   | **P   |
| Baseline   | 0.6771     | (0.6520, 0.7022)   | REF   | 0.6838     | (0.6587, 0.7088)  | REF  | *0.41 |
| Δ T2       | -0.0034    | (-0.0181, 0.0113)  | 0.65  | -0.0074    | (-0.0214, 0.0066) | 0.30 | 0.69  |
| Δ T6       | -0.0177    | (-0.0360, 0.0006)  | 0.05  | -0.0093    | (-0.0256, 0.0071) | 0.26 | 0.48  |
| Δ T12      | -0.0316    | (-0.0532, -0.0098) | 0.005 | -0.0126    | (-0.0326, 0.0074) | 0.21 | 0.20  |
| Adjusted   | % Change   | 95% CI             | *P    | % Change   | 95% CI            | *P   | **P   |
| Baseline   | REF        | REF                | REF   | REF        | REF               | REF  | *0.41 |
| Δ T2       | -0.50      | (-2.67, 1.67)      | 0.65  | -1.08      | (-3.13, 0.97)     | 0.30 | 0.69  |
| Δ T6       | -2.61      | (-5.32, 0.10)      | 0.05  | -1.36      | (-3.75, 1.03)     | 0.26 | 0.48  |
| Δ T12      | -4.66      | (-7.87, -1.45)     | 0.005 | -1.85      | (-4.78, 1.08)     | 0.21 | 0.20  |

\*P values for the sex- and time-specific changes.

\*\*P values for the \*global test of the sex by time interaction and time specific sex differences.

Adjusted for potential confounders: race, age, weight, height, smoking, alcohol use, bisphosphonates, glucocorticoids, hormone therapy, calcium supplements, comorbidity count, instrumental activities of daily living, center for epidemiologic studies depression scale, and DXA measurement site.

## Appendix A

The inverse probability of observation weights consisted of three component parts: (1) time-invariant likelihood of response for baseline covariate data; (2) time specific likelihood of survival conditional on response for baseline covariate data that was used to calculate cumulative survival probabilities over follow-up; and (3) time-varying likelihood of response for outcome data conditional on fully observed baseline covariates and survival. Probabilities were calculated using logistic regression modeling conditioning on fully observed baseline measures: sex, age, height, weight, comorbidity, and bone-active drugs. Component inverse probability of observation weights were stabilized using the observed time-specific sampling fractions for response and survival, and the final weights for participants included in outcome models was the cross product of the three constituents at each visit. The general form of the described weights is shown below, where the subscripts  $i$  and  $j$  correspond to individual  $i$  at time point  $j$ .

$$(R_{1X} R_{1Y} S) / (P(R_{1X} = 1) P(S_{1(i,j)} = 1 | R_{1X} = 1) P(R_{1(i,j)} = 1 | S = 1, R_{1X} = 1))$$
